# Supplementary material for: Ba2.5Pb1.5B12O22: structural transformation from a centrosymmetric to a noncentrosymmetric space group by introducing Pb into Ba2B6O11
Source: Royal Society of Chemistry journal article supplement (doi:10.1039/d1dt01368h), 2021-01-01

## Electronic Supporting Information

**Ba<sub>2.5</sub>Pb<sub>1.5</sub>B<sub>12</sub>O<sub>22</sub>**: Structural Transformation from Centrosymmetric

to Noncentrosymmetric Space Group via Introducing Pb into

**Ba<sub>2</sub>B<sub>6</sub>O<sub>11</sub>**

Kaitong Liu,<sup>a, b</sup> Jian Han,<sup>a, \*</sup> and Shilie Pan<sup>a, \*</sup>

<sup>a</sup> CAS Key Laboratory of Functional Materials and Devices for Special Environments;  
Xinjiang Technical Institute of Physics & Chemistry, CAS; Xinjiang Key Laboratory  
of Electronic Information Materials and Devices, 40-1 South Beijing Road, Urumqi  
830011, China.

<sup>b</sup> Center of Materials Science and Optoelectronics Engineering, University of Chinese  
Academy of Sciences, Beijing 100049, China.

\* Corresponding author: hanjian@ms.xjb.ac.cn; slpan@ms.xjb.ac.cn.

**Table S1.** Atomic coordinates, equivalent isotropic displacement parameters ( $\text{\AA}^2 \times 10^3$ ), and BVS for  $\text{Ba}_{2.5}\text{Pb}_{1.5}\text{B}_{12}\text{O}_{22}$ .  $U_{\text{eq}}$  is defined as one-third of the trace of the orthogonalized  $U_{ij}$  tensor.

| Atoms | x           | y           | z           | U(eq)       | BVS  |
|-------|-------------|-------------|-------------|-------------|------|
| Ba1B  | 0           | -0.84081(6) | -0.7288(5)  | 0.03072(19) | 2.29 |
| Pb1B  | 0           | -0.84081(6) | -0.7288(5)  | 0.03072(19) | 2.29 |
| Pb2B  | -0.01384(4) | -0.58705(7) | -0.3736(5)  | 0.0245(3)   | 2.24 |
| Ba2   | -0.17856(3) | -0.74365(5) | -0.1025(5)  | 0.01751(14) | 2.27 |
| B1    | -0.1852(5)  | -0.5348(9)  | -0.4433(13) | 0.0155(13)  | 3.09 |
| B2    | -0.1659(5)  | -0.4002(9)  | -0.2086(13) | 0.0146(17)  | 3.06 |
| B3    | -0.1471(5)  | -0.7541(9)  | -0.4972(13) | 0.0141(15)  | 3.12 |
| B4    | -0.3118(5)  | -0.4696(10) | -0.4218(13) | 0.0192(19)  | 3.00 |
| B5    | -0.0649(6)  | -0.9188(10) | -0.3997(13) | 0.0203(19)  | 3.07 |
| B6    | 0           | -0.6542(9)  | -0.0036(10) | 0.029(3)    | 3.14 |
| B7    | 0.0172(3)   | -0.8397(6)  | -0.1691(4)  | 0.017(4)    | 2.98 |
| O1    | -0.1614(3)  | -0.4215(5)  | -0.3646(9)  | 0.0140(11)  | 2.10 |
| O2    | -0.1665(4)  | -0.2789(6)  | -0.1546(9)  | 0.0167(13)  | 1.93 |
| O3    | -0.2016(3)  | -0.8445(6)  | -0.4386(9)  | 0.0162(12)  | 2.01 |
| O4A   | -0.3804(5)  | -0.4989(15) | -0.3775(19) | 0.015(3)    | 2.16 |
| O4B   | -0.3787(5)  | -0.5208(14) | -0.4394(18) | 0.014(3)    | 1.63 |
| O5    | -0.1464(3)  | -0.6443(5)  | -0.3958(8)  | 0.0160(11)  | 2.10 |
| O6    | -0.1750(4)  | -0.5045(6)  | -0.6090(10) | 0.0306(14)  | 2.19 |
| O7    | 0           | -0.9762(8)  | -0.4443(11) | 0.0140(16)  | 2.24 |
| O8    | -0.2612(3)  | -0.5570(6)  | -0.4195(9)  | 0.0232(13)  | 2.01 |
| O9    | -0.0793(3)  | -0.8121(6)  | -0.4968(9)  | 0.0166(11)  | 2.20 |
| O10   | 0           | -0.3727(11) | -0.3499(13) | 0.036(3)    | 2.15 |
| O11   | 0.0726(6)   | -0.9029(12) | -0.2340(12) | 0.023(3)    | 2.13 |
| O12   | 0.0276(5)   | -0.7668(10) | -0.0398(11) | 0.022(2)    | 2.04 |
| O13   | -0.0486(5)  | -0.8492(11) | -0.2334(12) | 0.015(2)    | 1.64 |
| O14   | 0.0325(9)   | -0.5813(13) | -0.1099(19) | 0.044(4)    | 1.96 |

**Table S2.** Selected bond lengths (Å) and angles (deg.) for  $\text{Ba}_{2.5}\text{Pb}_{1.5}\text{B}_{12}\text{O}_{22}$ .

|                       |            |                    |            |
|-----------------------|------------|--------------------|------------|
| Ba(1B)-O(10)#1        | 2.517(13)  | B(2)-O(1)          | 1.365(12)  |
| Ba(1B)-O(9)           | 2.524(6)   | B(2)-O(2)          | 1.382(11)  |
| Ba(1B)-O(9)#2         | 2.524(6)   | B(3)-O(9)          | 1.435(11)  |
| Ba(1B)-O(7)#3         | 2.701(9)   | B(3)-O(2)#10       | 1.448(12)  |
| Ba(1B)-O(7)           | 2.848(9)   | B(3)-O(5)          | 1.466(11)  |
| Pb(2B)-O(10)          | 2.323(12)  | B(3)-O(3)          | 1.508(11)  |
| Pb(2B)-O(14)          | 2.437(17)  | B(4)-O(8)          | 1.345(12)  |
| Pb(2B)-O(5)           | 2.605(6)   | B(4)-O(3)#11       | 1.374(12)  |
| Ba(2)-O(6)#7          | 2.664(7)   | B(4)-O(4B)         | 1.397(13)  |
| Ba(2)-O(1)#7          | 2.728(6)   | B(4)-O(4A)         | 1.397(13)  |
| Ba(2)-O(5)            | 2.810(6)   | B(5)-O(4A)#9       | 1.570(19)  |
| Ba(2)-O(3)#8          | 2.843(6)   | B(5)-O(7)          | 1.433(11)  |
| Ba(2)-O(8)#8          | 2.893(7)   | B(5)-O(9)          | 1.443(12)  |
| Ba(2)-O(13)           | 2.946(9)   | B(5)-O(4B)#9       | 1.365(18)  |
| Ba(2)-O(2)#9          | 3.010(7)   | Pb(1B)-O(9)        | 2.524(6)   |
| Ba(2)-O(4B)#8         | 3.090(15)  | B(6)#1-O(10)       | 1.354(8)   |
| Ba(2)-O(3)            | 3.123(7)   | O(13)-B(7)         | 1.374(8)   |
| B(1)-O(5)             | 1.446(12)  | O(12)-B(7)         | 1.374(8)   |
| B(1)-O(1)             | 1.464(12)  | O(12)-B(6)         | 1.354(8)   |
| B(1)-O(6)             | 1.476(13)  | B(7)-O(11)         | 1.374(8)   |
| B(1)-O(8)             | 1.482(12)  | O(14)-B(6)         | 1.354(8)   |
| B(2)-O(6)#7           | 1.346(13)  |                    |            |
| O(10)#1-Ba(1B)-O(9)   | 102.5(2)   | O(3)#8-Ba(2)-O(3)  | 117.53(11) |
| O(10)#1-Ba(1B)-O(9)#2 | 102.6(2)   | O(8)#8-Ba(2)-O(3)  | 101.15(17) |
| O(9)-Ba(1B)-O(9)#2    | 73.5(3)    | O(13)-Ba(2)-O(3)   | 68.3(2)    |
| O(10)#1-Ba(1B)-O(7)#3 | 112.1(3)   | O(2)#9-Ba(2)-O(3)  | 71.35(16)  |
| O(9)-Ba(1B)-O(7)#3    | 129.25(18) | O(4B)#8-Ba(2)-O(3) | 100.8(3)   |
| O(9)#2-Ba(1B)-O(7)#3  | 129.25(18) | O(5)-B(1)-O(1)     | 112.6(7)   |
| O(10)#1-Ba(1B)-O(7)   | 145.1(3)   | O(5)-B(1)-O(6)     | 112.6(8)   |
| O(9)-Ba(1B)-O(7)      | 51.76(17)  | O(1)-B(1)-O(6)     | 103.0(7)   |
| O(9)#2-Ba(1B)-O(7)    | 51.76(17)  | O(5)-B(1)-O(8)     | 109.3(7)   |
| O(7)#3-Ba(1B)-O(7)    | 102.74(6)  | O(1)-B(1)-O(8)     | 111.9(7)   |
| O(10)-Pb(2B)-O(14)    | 81.5(4)    | O(6)-B(1)-O(8)     | 107.3(8)   |
| O(10)-Pb(2B)-O(5)     | 110.46(14) | O(6)#7-B(2)-O(1)   | 120.6(8)   |
| O(14)-Pb(2B)-O(5)     | 115.2(4)   | O(6)#7-B(2)-O(2)   | 120.0(9)   |
| O(6)#7-Ba(2)-O(1)#7   | 50.5(2)    | O(1)-B(2)-O(2)     | 119.3(8)   |
| O(6)#7-Ba(2)-O(5)     | 66.2(2)    | O(9)-B(3)-O(2)#10  | 109.7(8)   |
| O(1)#7-Ba(2)-O(5)     | 113.74(18) | O(9)-B(3)-O(5)     | 109.7(7)   |
| O(6)#7-Ba(2)-O(3)#8   | 72.5(2)    | O(2)#10-B(3)-O(5)  | 111.3(7)   |

|                      |            |                       |            |
|----------------------|------------|-----------------------|------------|
| O(1)#7-Ba(2)-O(3)#8  | 60.53(17)  | O(9)-B(3)-O(3)        | 109.9(7)   |
| O(5)-Ba(2)-O(3)#8    | 119.69(18) | O(2)#10-B(3)-O(3)     | 107.2(7)   |
| O(6)#7-Ba(2)-O(8)#8  | 139.5(2)   | O(5)-B(3)-O(3)        | 108.9(7)   |
| O(1)#7-Ba(2)-O(8)#8  | 96.79(19)  | O(8)-B(4)-O(3)#11     | 123.3(9)   |
| O(5)-Ba(2)-O(8)#8    | 148.96(18) | O(8)-B(4)-O(4B)       | 112.5(10)  |
| O(3)#8-Ba(2)-O(8)#8  | 69.93(17)  | O(3)#11-B(4)-O(4B)    | 122.8(10)  |
| O(6)#7-Ba(2)-O(13)   | 110.8(3)   | O(8)-B(4)-O(4A)       | 120.6(11)  |
| O(1)#7-Ba(2)-O(13)   | 115.8(3)   | O(3)#11-B(4)-O(4A)    | 115.0(10)  |
| O(5)-Ba(2)-O(13)     | 67.6(3)    | O(4A)#9-B(5)-O(7)     | 115.2(9)   |
| O(3)#8-Ba(2)-O(13)   | 172.5(3)   | O(4A)#9-B(5)-O(9)     | 115.8(9)   |
| O(8)#8-Ba(2)-O(13)   | 104.9(3)   | O(7)-B(5)-O(9)        | 110.4(8)   |
| O(6)#7-Ba(2)-O(2)#9  | 98.5(2)    | O(4A)#9-B(5)-O(4B)#9  | 21.5(7)    |
| O(1)#7-Ba(2)-O(2)#9  | 108.13(17) | O(7)-B(5)-O(4B)#9     | 103.5(8)   |
| O(5)-Ba(2)-O(2)#9    | 97.34(18)  | O(9)-B(5)-O(4B)#9     | 107.2(9)   |
| O(3)#8-Ba(2)-O(2)#9  | 47.89(18)  | O(13)-B(7)-O(11)      | 120.01(10) |
| O(8)#8-Ba(2)-O(2)#9  | 66.39(19)  | O(13)-B(7)-O(12)      | 120.01(10) |
| O(13)-Ba(2)-O(2)#9   | 136.0(3)   | O(11)-B(7)-O(12)      | 119.98(10) |
| O(6)#7-Ba(2)-O(4B)#8 | 144.9(3)   | O(10)#14-B(6)-O(14)   | 122.5(11)  |
| O(1)#7-Ba(2)-O(4B)#8 | 98.5(3)    | O(10)#14-B(6)-O(12)   | 114.6(10)  |
| O(5)-Ba(2)-O(4B)#8   | 129.9(3)   | O(14)-B(6)-O(12)      | 100.5(9)   |
| O(3)#8-Ba(2)-O(4B)#8 | 109.2(3)   | O(10)#1-Pb(1B)-O(9)   | 102.5(2)   |
| O(8)#8-Ba(2)-O(4B)#8 | 44.6(2)    | O(10)#1-Pb(1B)-O(9)#2 | 102.6(2)   |
| O(13)-Ba(2)-O(4B)#8  | 64.1(3)    | O(9)-Pb(1B)-O(9)#2    | 73.5(3)    |
| O(2)#9-Ba(2)-O(4B)#8 | 108.2(2)   | O(10)#1-Pb(1B)-O(7)#3 | 112.1(3)   |
| O(6)#7-Ba(2)-O(3)    | 109.3(2)   | O(9)-Pb(1B)-O(7)#3    | 129.25(18) |
| O(1)#7-Ba(2)-O(3)    | 159.78(16) | O(9)#2-Pb(1B)-O(7)#3  | 129.25(18) |
| O(5)-Ba(2)-O(3)      | 47.81(17)  |                       |            |

Symmetry transformations used to generate equivalent atoms:

#1  $-x+2,-y+1,z-1/2$  #2  $-x+2,y,z$  #3  $-x+2,-y,z-1/2$   
#4  $x,y,z-1$  #5  $x,-y,z-1/2$  #6  $-x+2,y,z-1$  #7  $x,-y+1,z+1/2$   
#8  $-x+3/2,-y+1/2,z+1/2$  #9  $-x+3/2,y-1/2,z$  #10  $x,-y+1,z-1/2$   
#11  $-x+3/2,y+1/2,z$  #12  $-x+3/2,-y+1/2,z-1/2$  #13  $-x+2,-y,z+1/2$   
#14  $-x+2,-y+1,z+1/2$  #15  $x,y,z+1$

**Figure S1.** Ball and stick structure of  $\text{Ba}_2\text{B}_6\text{O}_{11}$ . (a)  $[\text{B}_3\text{O}_7]^{5-}$  group; (b)  $[\text{B}_3\text{O}_8]^{7-}$  group; (c) the FBB  $[\text{B}_6\text{O}_{14}]^{10-}$  formed by  $[\text{B}_3\text{O}_7]^{5-}$  and  $[\text{B}_3\text{O}_8]^{7-}$  group; (d) the two-dimensional layer  $\infty^2[\text{B}_6\text{O}_{10}]$ ; (e) the Ba1 and Ba2 cations filled the tunnels and interstices formed by  $\infty^2[\text{B}_6\text{O}_{10}]$  layers.

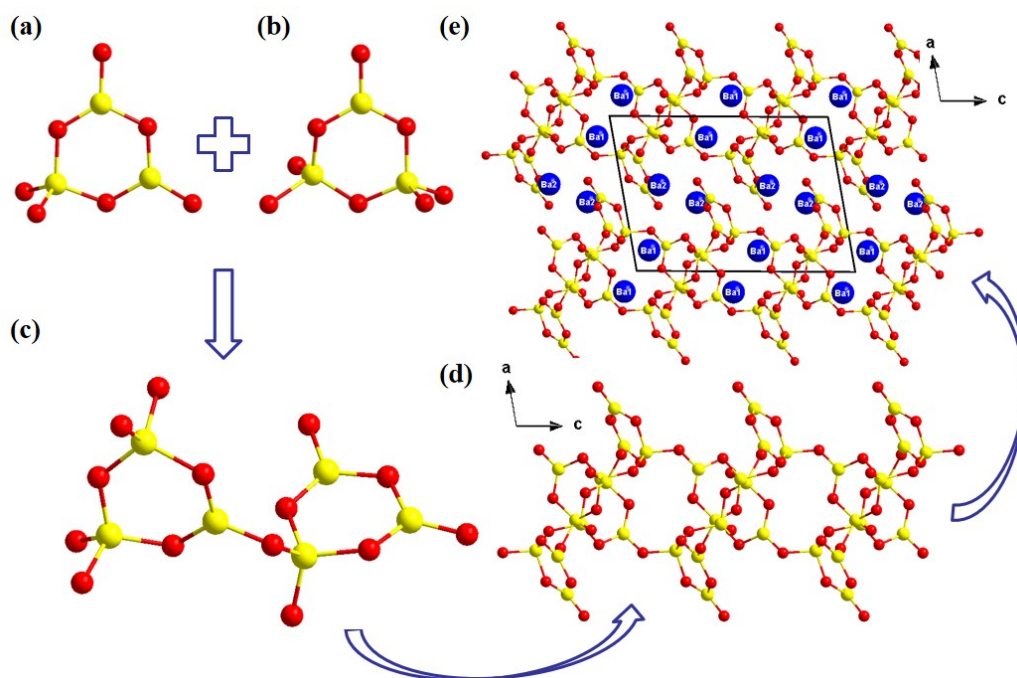

Supplement: d1dt01368h1.pdf [file d1dt01368h1.pdf]
